# Supplementary material for: Prostaglandin F2 Alpha Triggers the Disruption of Cell Adhesion with Cytokeratin and Vimentin in Bovine Luteal Theca Cells
Source: MDPI journal article supplement (doi:10.3390/ani11041073), 2021-04-09
Supplement: s1 [file s1]

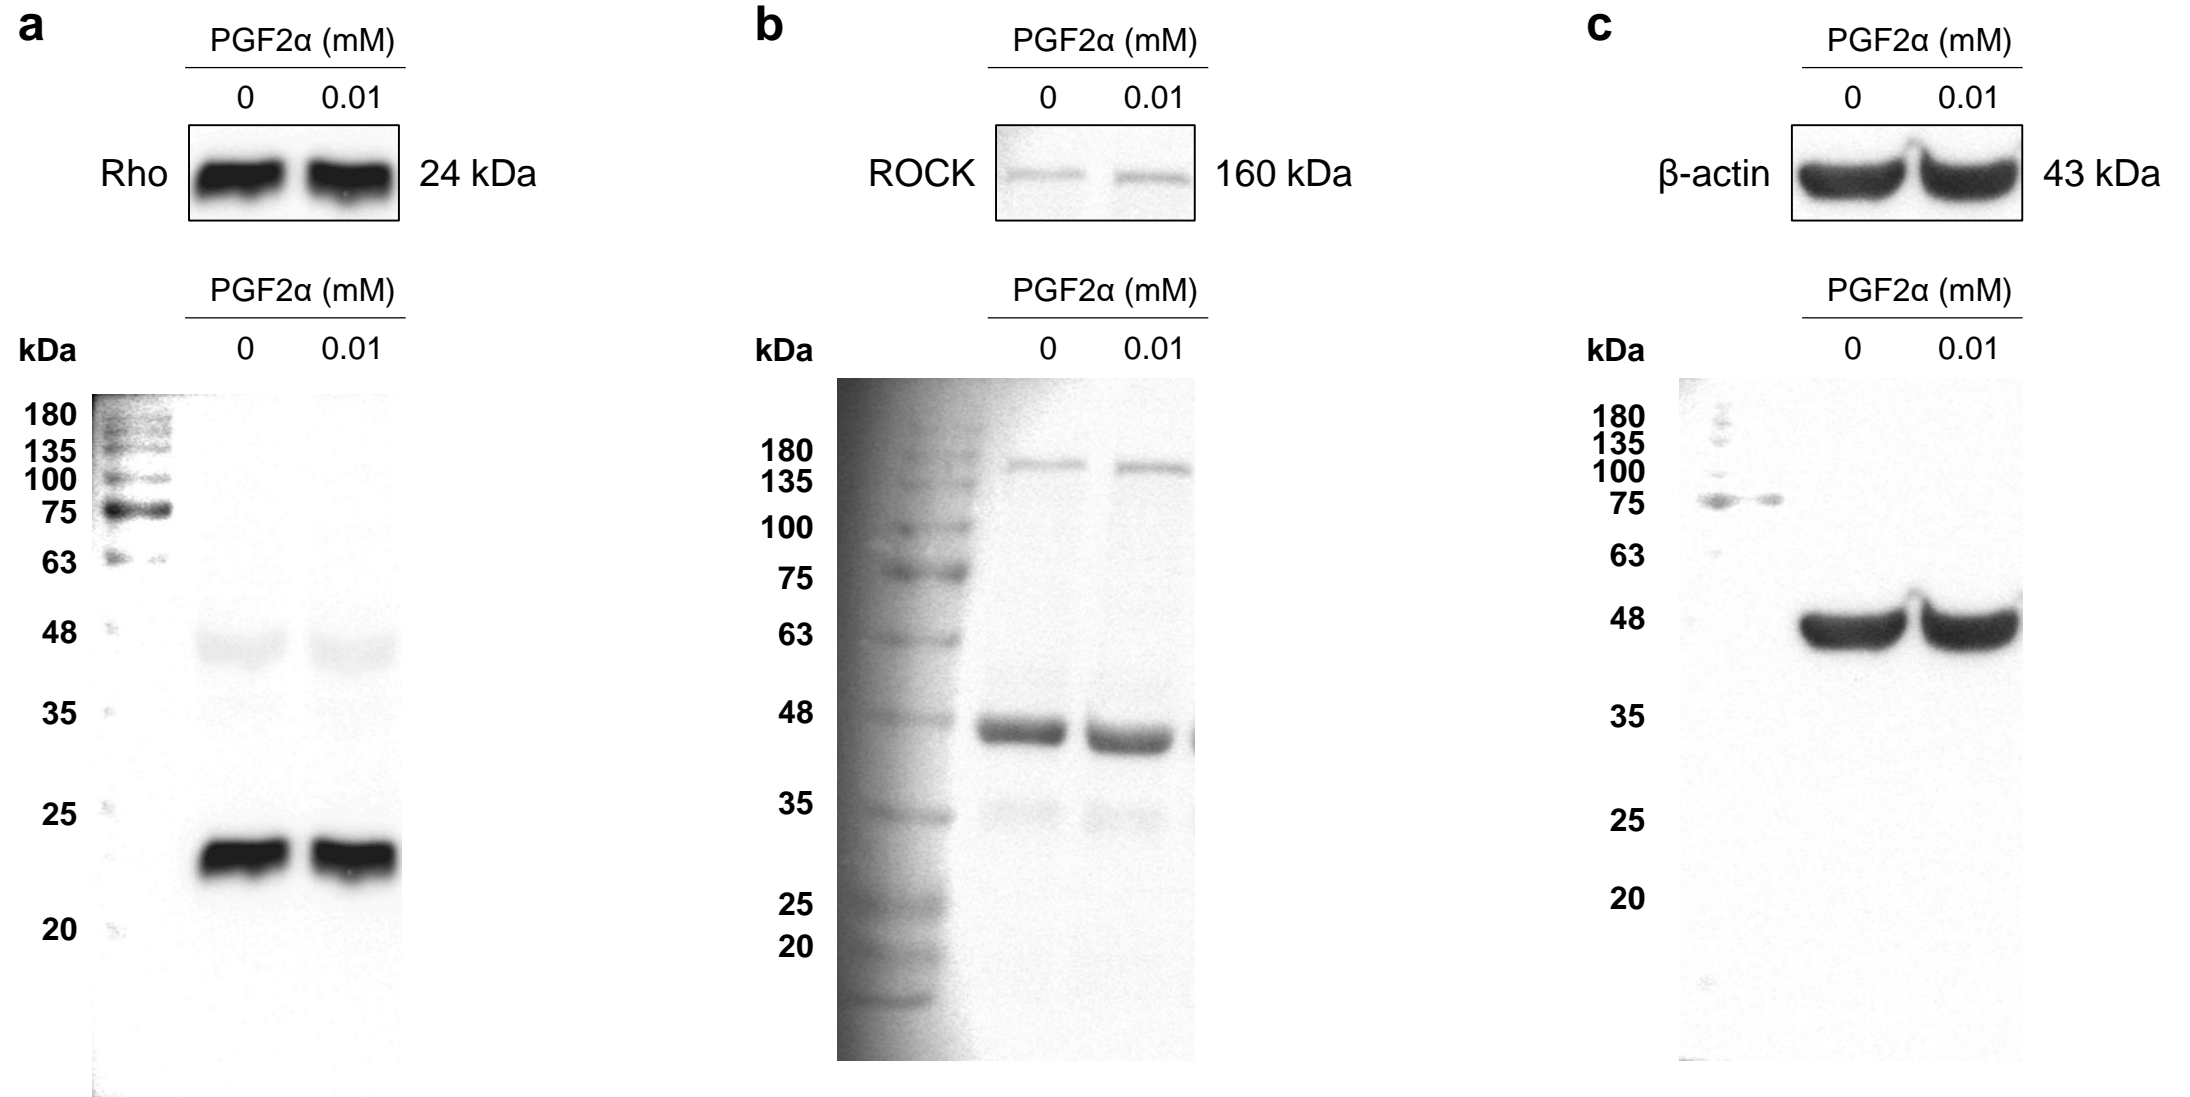

Supplementary figure 1. Influence of prostaglandin F2 alpha (PGF2 $\alpha$ ) on Rho (a) and Rho-associated protein kinase (ROCK, b) protein in bovine luteal theca cells (LTCs). Rho and ROCK proteins were normalized by  $\beta$ -actin (c). This data are corresponded in Figure 6 of manuscript.
